# Supplementary material
Source: ML conference proceedings conference paper supplement (https://openaccess.thecvf.com/content/WACV_2020/html/Poursaeed_Neural_Puppet_Generative_WACV_2020_paper.html)
Supplement: Supplementary file 1 [file Poursaeed_Neural_Puppet_Generative_WACV_2020_supplemental.pdf]

Archive with 10 entries (9 files):
- 247-supp/
- __MACOSX/._247-supp
- 247-supp/.DS_Store
- __MACOSX/247-supp/._.DS_Store
- 247-supp/Interpolation.mp4
- __MACOSX/247-supp/._Interpolation.mp4
- 247-supp/Deformation.mp4
- __MACOSX/247-supp/._Deformation.mp4
- 247-supp/247-supp.pdf
- __MACOSX/247-supp/._247-supp.pdf
